# Supplementary material for: UCHL5 Promotes Proliferation and Migration of Bladder Cancer Cells by Activating c-Myc via AKT/mTOR Signaling
Source: MDPI journal article supplement (doi:10.3390/cancers14225538), 2022-11-10

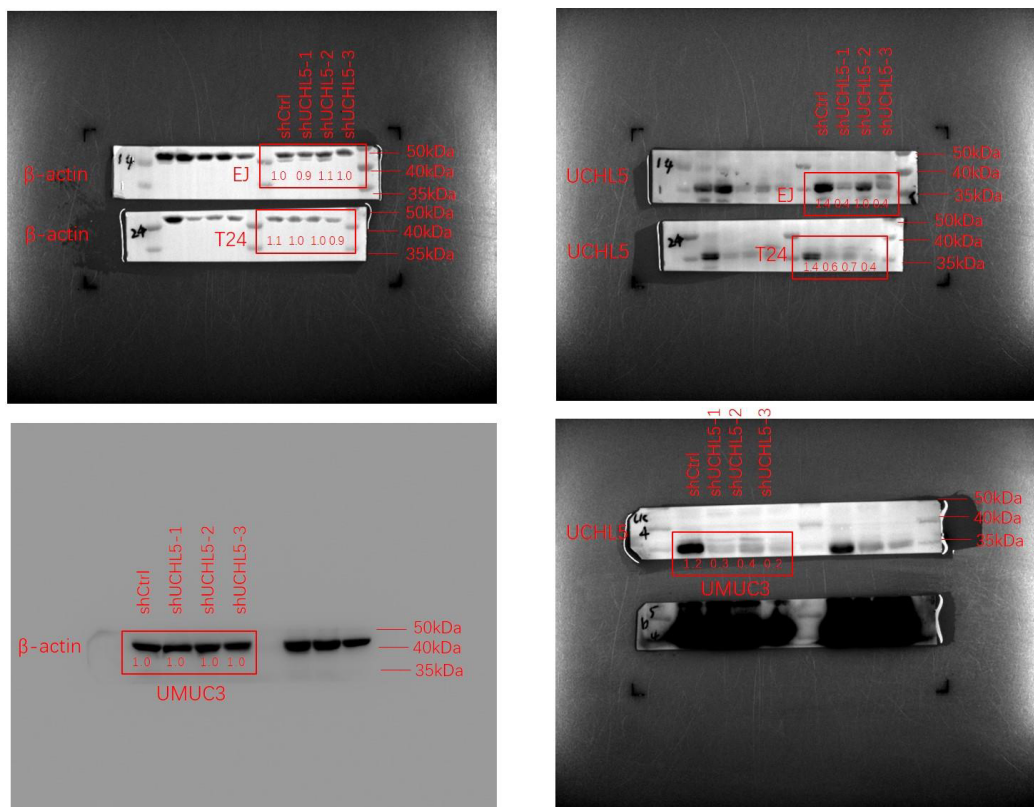

Figure 2A: Original pictures of western blot bands including intensity ratio

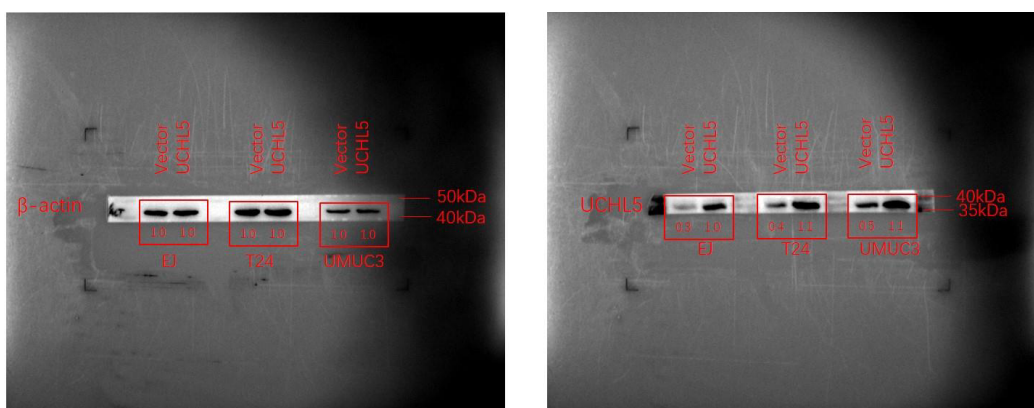

Figure 3A: Original pictures of western blot bands including intensity ratio

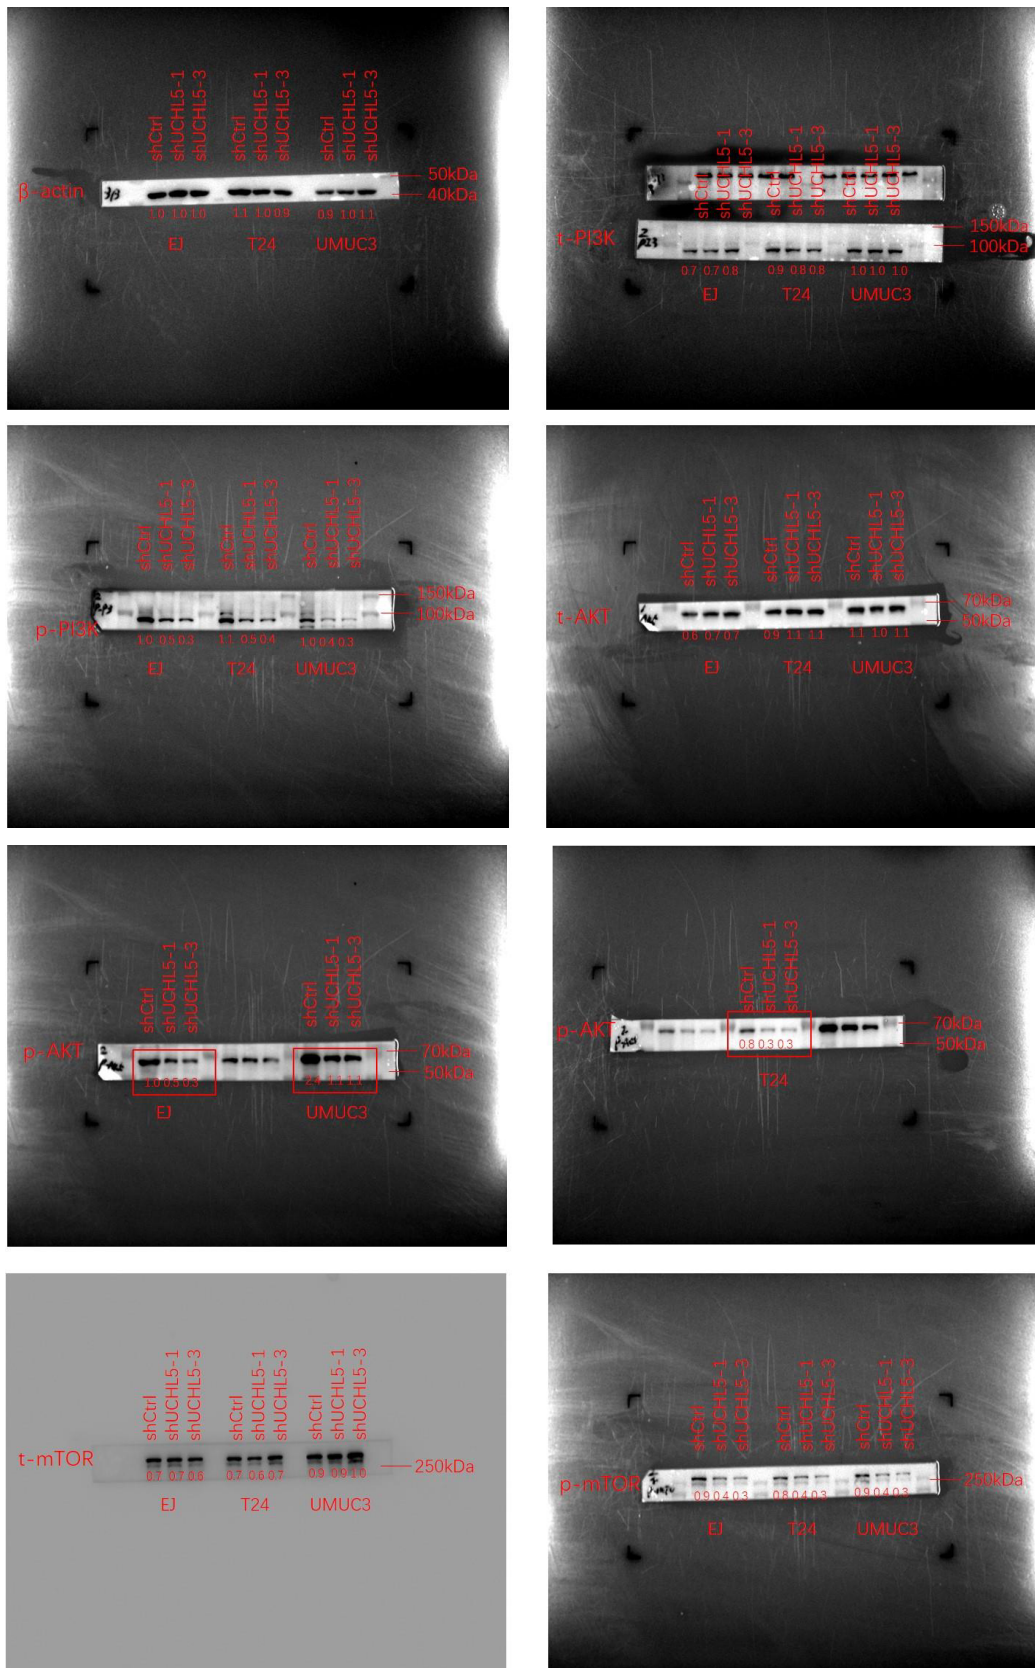

Figure 4H: Original pictures of western blot bands including intensity ratio

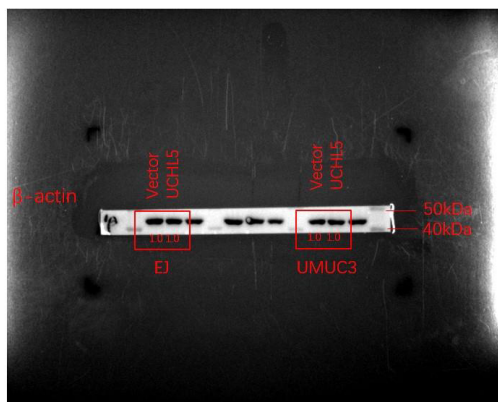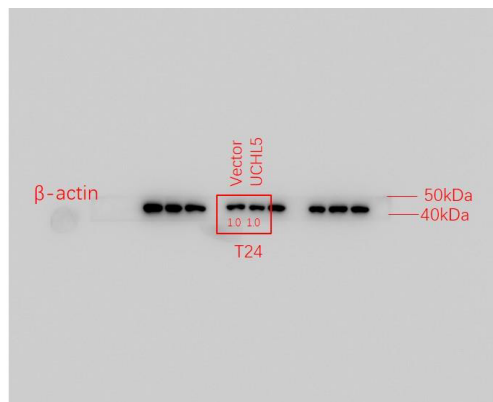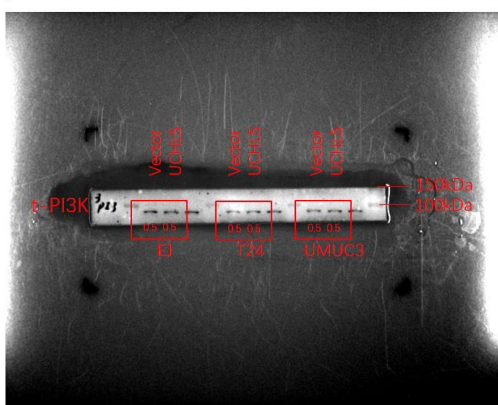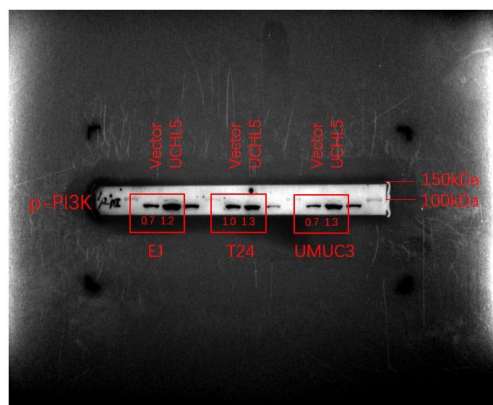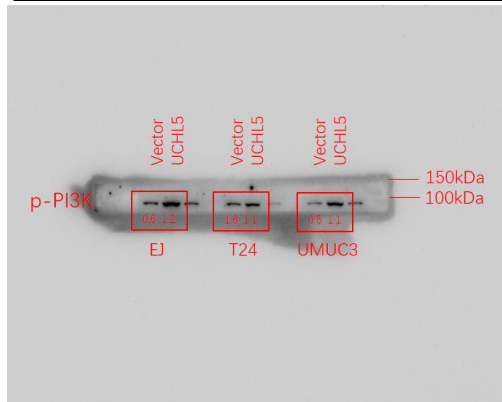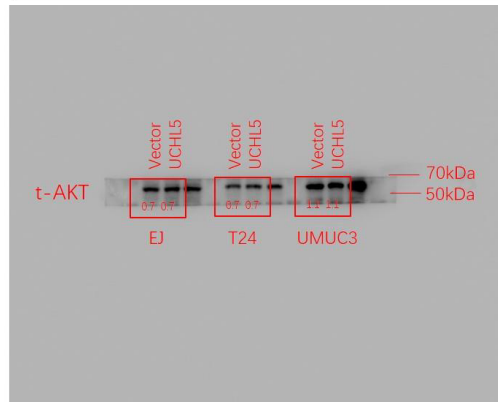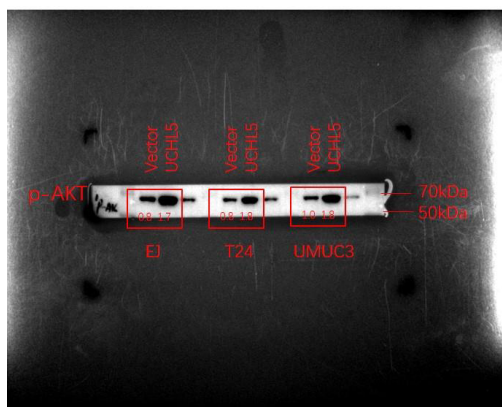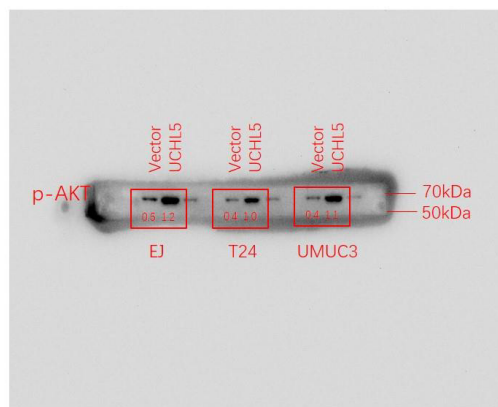



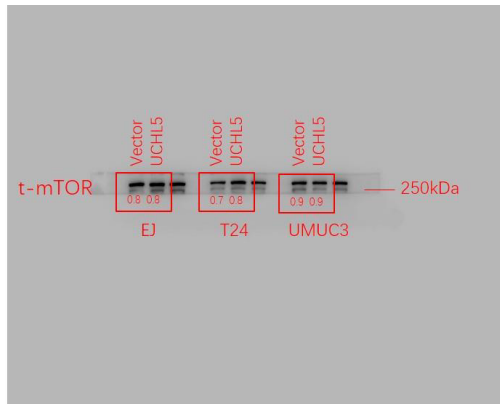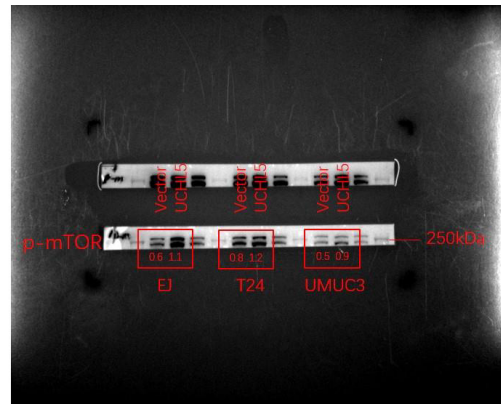

Figure 4l: Original pictures of western blot bands including intensity ratio

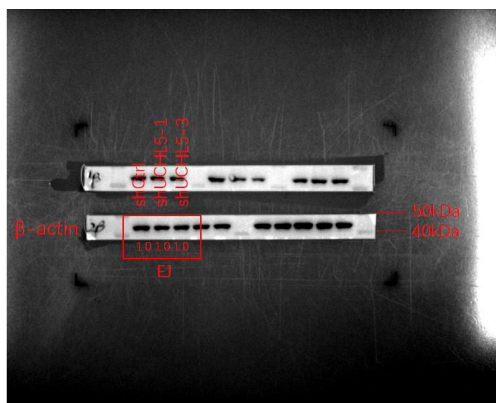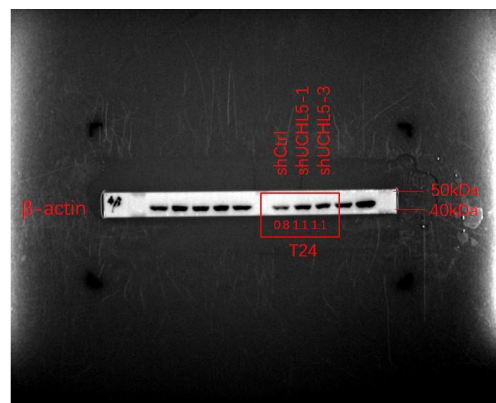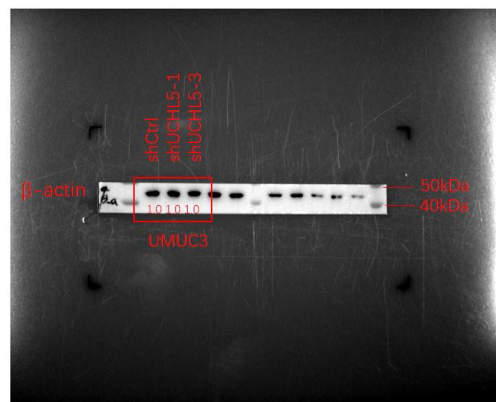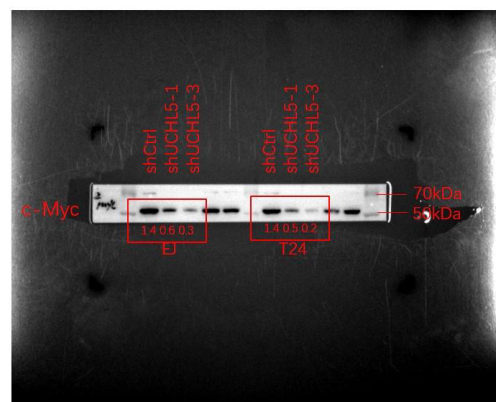



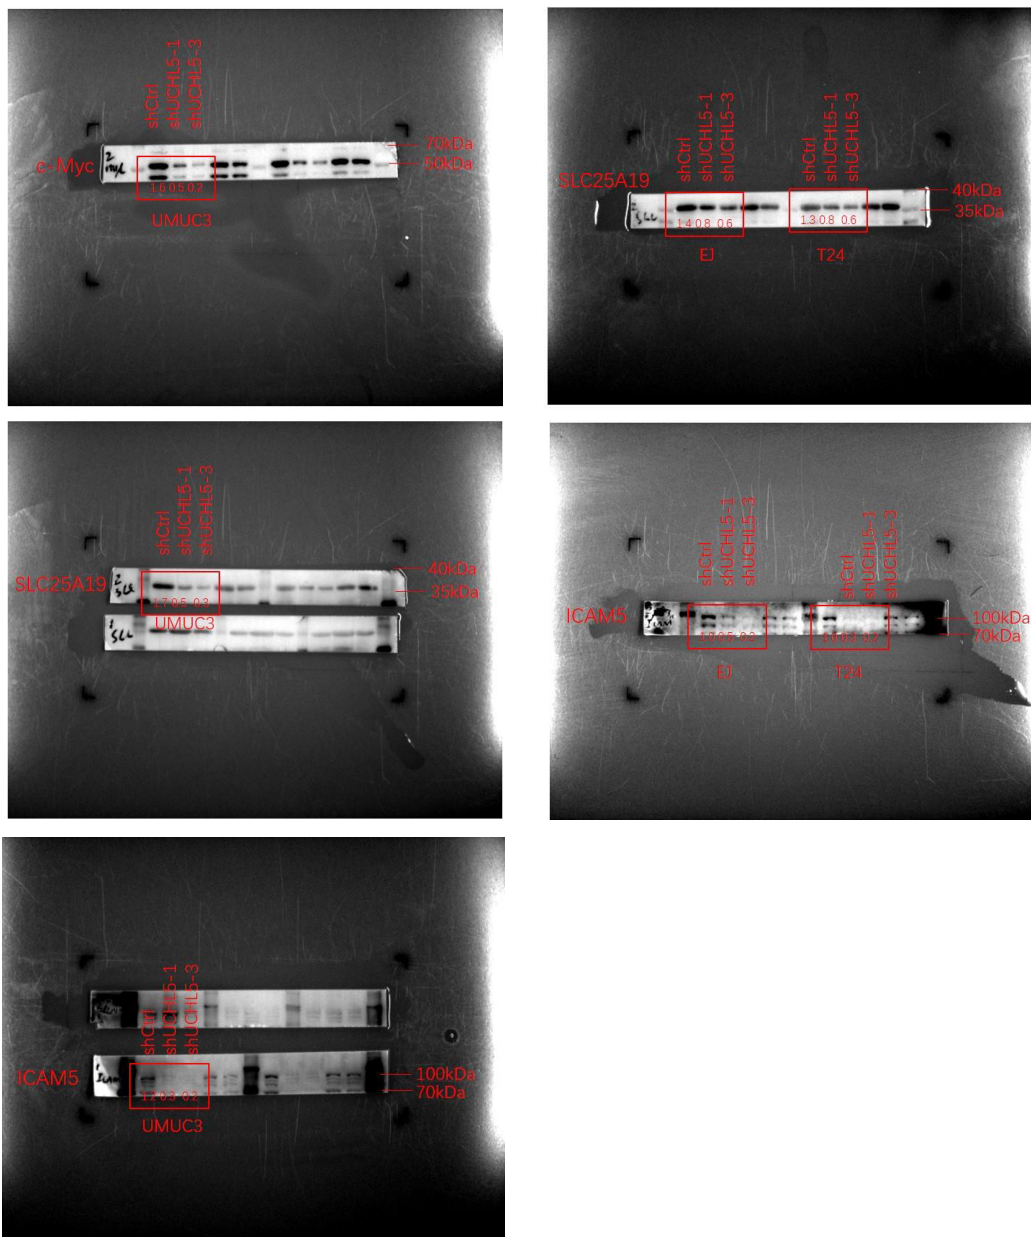

Figure 4J: Original pictures of western blot bands including intensity ratio

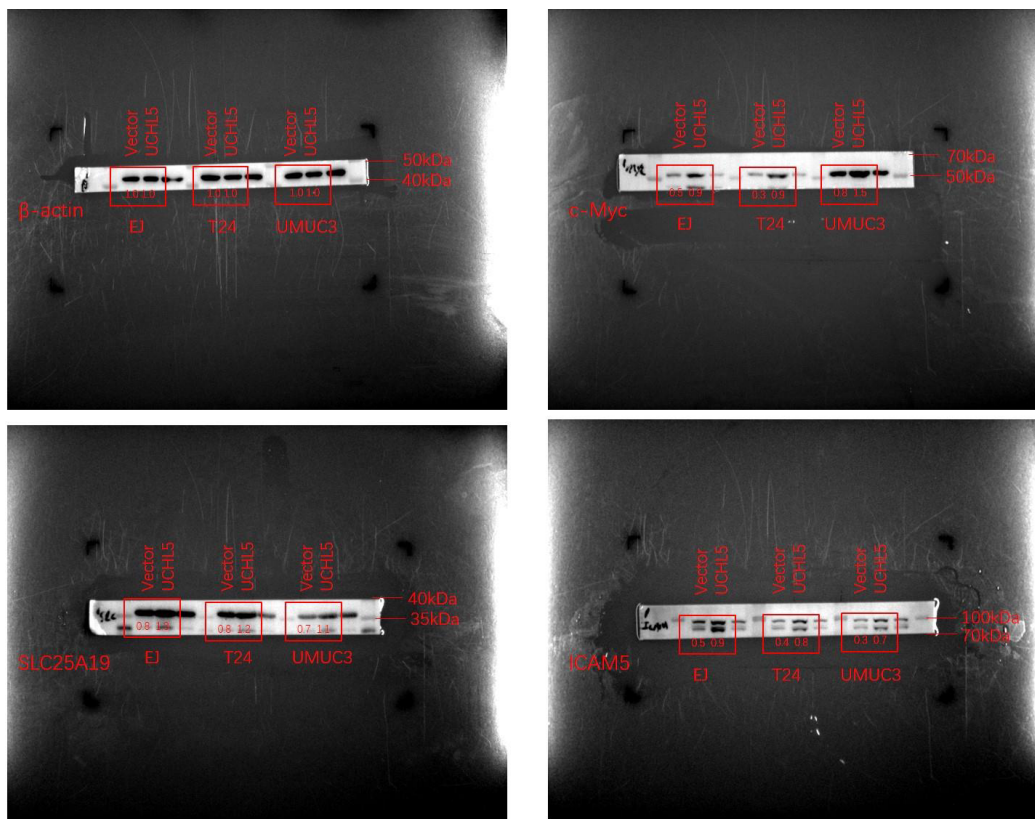

Figure 4K: Original pictures of western blot bands including intensity ratio

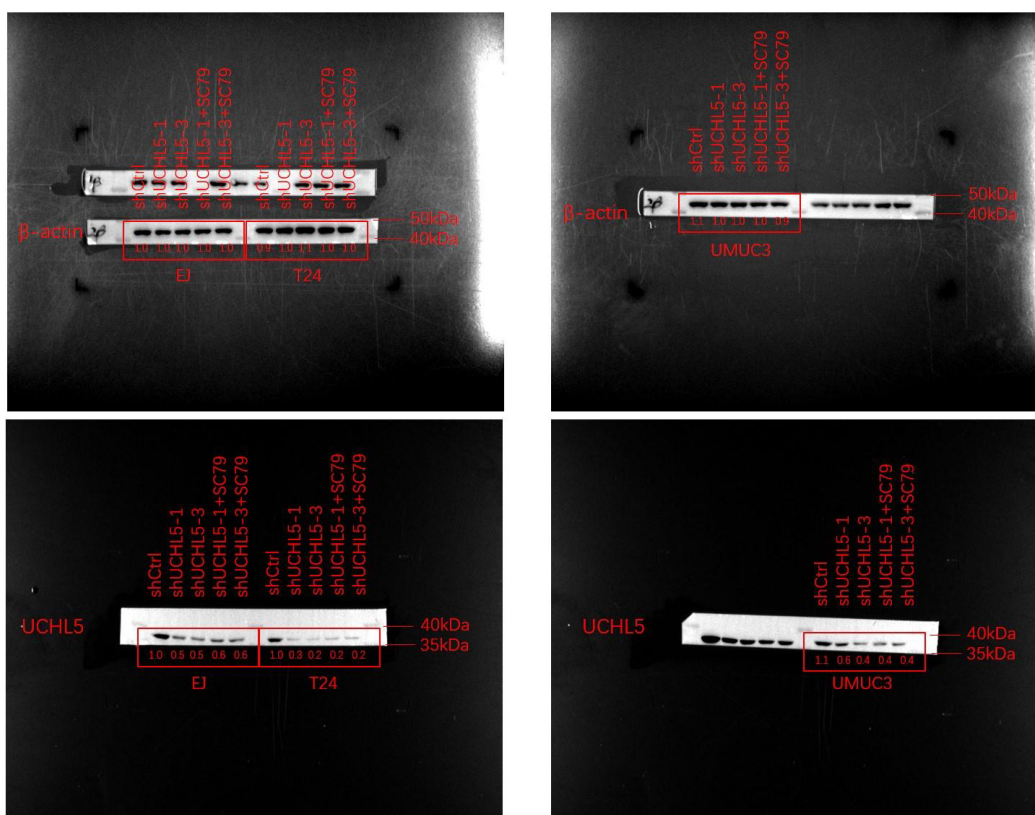

Supplement: s1 [file s1]
