# Supplementary material for: UCHL5 Promotes Proliferation and Migration of Bladder Cancer Cells by Activating c-Myc via AKT/mTOR Signaling
Source: MDPI journal article supplement (doi:10.3390/cancers14225538), 2022-11-10
Supplement: s1 [file s1]

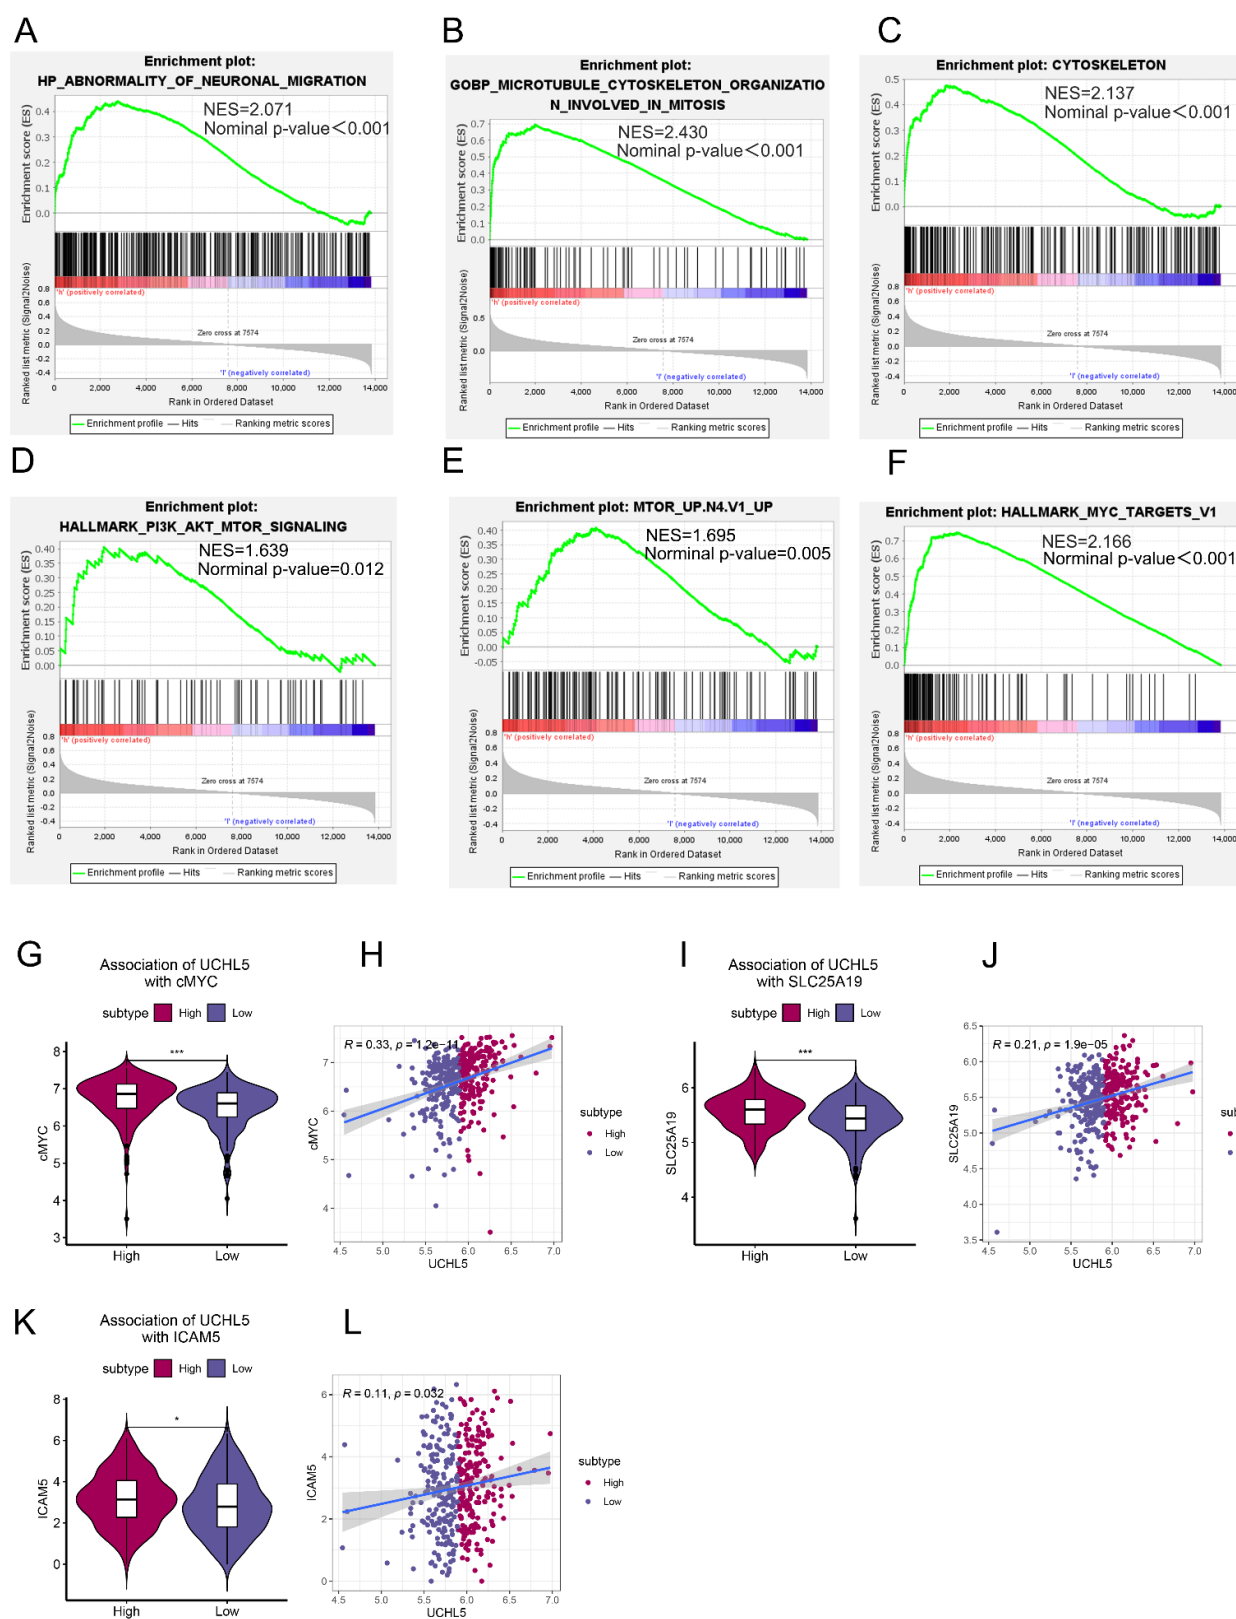

**Figure S1.** Bioinformatics Analysis demonstrates UCHL5 knockdown inhibits migration, cytoskeleton, and AKT/mTOR-c-Myc signaling pathway. (A–C) Data from RNA-seq and GSEA present that

UCLH5 knockdown represses the migration and cytoskeleton signaling pathway. **(D-F)** Data from the TCGA database show that UCLH5 knockdown inhibits the PI3K/AKT/mTOR signaling pathway and c-Myc expression. **(G)** The difference in c-Myc scores is defined using ssGSEA between the UCLH5 high- and low-expressed groups. **(H)** The association of UCLH5 expression and c-Myc score. **(I)** Difference in SLC25A19 expression between UCLH5 high - and low-expressed groups. **(J)** Association of UCLH5 and SLC25A19 expression. **(K)** Differences in ICAM5 expression between UCLH5 high- and low-expressed groups. **(L)** Association of UCLH5 and ICAM5 expression.

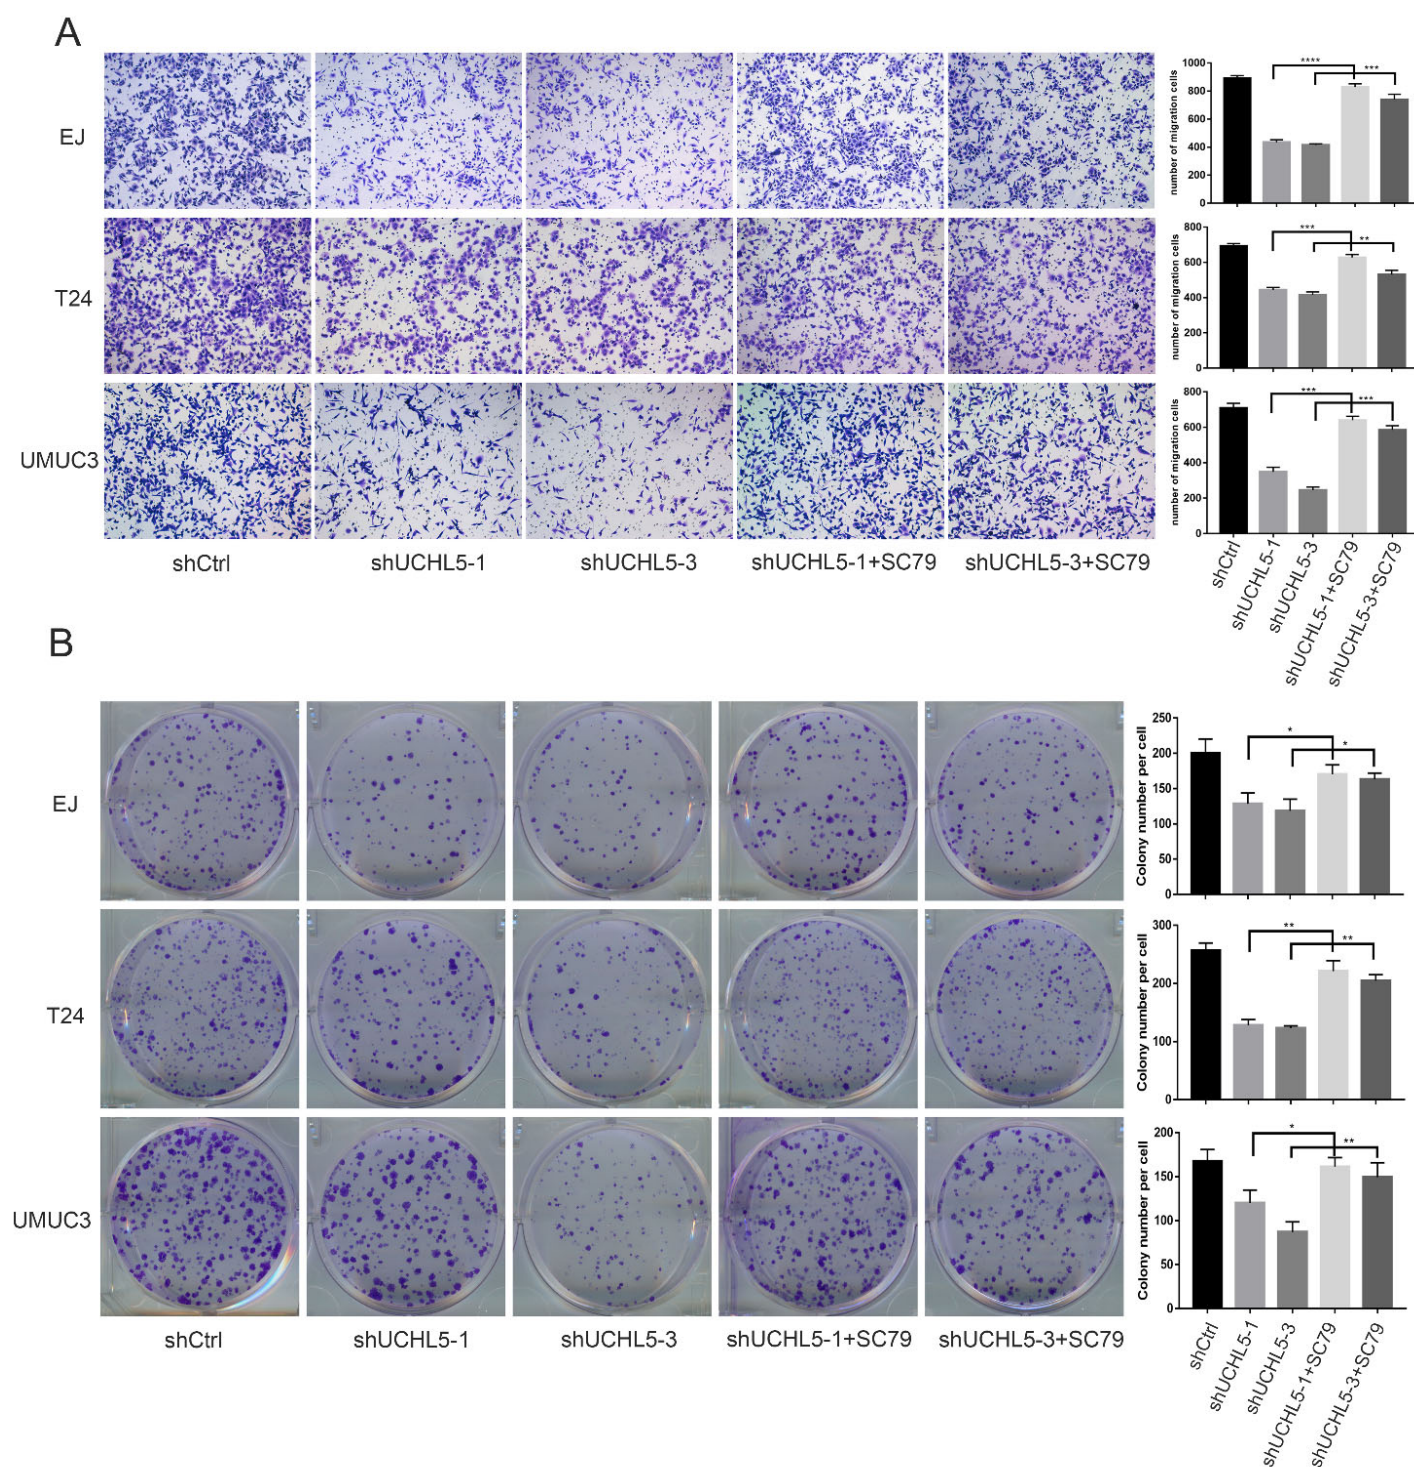

**Figure S2.** SC79 reverses the effects of UCL5 silencing in bladder cancer cells. **(A, B)** The UCL5-1 group is removed to for increased conciseness and clarity of the images in Figure 5A,B, and the complete image with the UCL5-1 group can be viewed in Supplementary Figure 2. We found that SC79, an activator of AKT, completely reverses the diminished cell migration and colony formation ability resulting from transfection of UCL5-1 and UCL5-3 shRNA.

**Table S1.** Primer sequences for qRT-PCR.

| Gene (Human) | Forward primer (5'~3') | Reverse primer (5'~3') |
|--------------|------------------------|------------------------|
| ACTB         | CATGTACGTTGCTATCCAGGC  | CTCCTTAATGTCACGCACGAT  |
| c-Myc        | GGCTCCTGGCAAAAGGTCA    | CTGCGTAGTTGTGCTGATGT   |
| SLC25A19     | GGTCTGTGTCTGGACTTGTAC  | GCTGAAGCTGGAAACGGATCT  |
| ICAM5        | CAGAGGGGTTTGCCTTGTT    | GAAAGTGCGAATGAGCCCCAC  |

**Table S2.** Primary antibodies for Western Blot and immunohistochemical.

| Antigens (Human) | Species antibodies raised in | Dilution                   | Supplier             |
|------------------|------------------------------|----------------------------|----------------------|
| UCHL5            | Rabbit, polyclonal           | 1:1000 (WB)<br>1:200 (IHC) | Abclonal A7978       |
| t-AKT            | Rabbit, monoclonal           | 1:1000 (WB)                | Abclonal A17909      |
| p-AKT            | Rabbit, monoclonal           | 1:1000 (WB)<br>1:200 (IHC) | Abclonal AP0637      |
| t-mTOR           | Rabbit, polyclonal           | 1:1000 (WB)                | Abclonal A11354      |
| p-mTOR           | Rabbit, monoclonal           | 1:1000 (WB)                | Abclonal AP0115      |
| t-PI3K           | Rabbit, monoclonal           | 1:200 (IHC)                | Abclonal A19684      |
| p-PI3K           | Rabbit, polyclonal           | 1:1000 (WB)<br>1:200 (IHC) | Abclonal AP0854      |
| c-Myc            | Rabbit, monoclonal           | 1:1000 (WB)<br>1:200 (IHC) | Cell Signaling #9402 |
| SLC25A19         | Rabbit, polyclonal           | 1:1000 (WB)                | Abclonal A12373      |
| ICAM5            | Rabbit, polyclonal           | 1:1000 (WB)                | Abclonal A4156       |
| Ki67             | Mouse, monoclonal            | 1:200 (IHC)                | Cell Signaling #9449 |
| β-actin          | Rabbit, monoclonal           | 1:1000 (WB)                | Abclonal AC038       |

**Table S3.** Secondary antibodies for Western Blot and immunohistochemical.

| Secondary detection system used | Species antibodies raised in | Dilution     | Supplier                  |
|---------------------------------|------------------------------|--------------|---------------------------|
| Anti-Rabbit-IgG (H+L)-HRP       | Goat                         | 1:10000 (WB) | Abclonal, USA, Cat. AS014 |
| Anti-rabbit IgG H&L(HRP)        | Goat                         | 1:2000 (IHC) | Abcam, USA, cat. ab205718 |
| Anti-mouse IgG H&L(HRP)         | Goat                         | 1:2000 (IHC) | Abcam, USA, cat. Ab678    |
